# Supplementary material for: Injury risk factors, screening tests and preventative strategies: a systematic review of the evidence that underpins the perceptions and practices of 44 football (soccer) teams from various premier leagues
Source: PubMed Central journal article supplement — Br J Sports Med. 2015 Jan 9;49(9):583–9. doi: 10.1136/bjsports-2014-094104 (PMC4413799; doi:10.1136/bjsports-2014-094104), 2015-01-09
Supplement: bjsports-2014-094104-s1.pdf [file bjsports-2014-094104-s1.pdf]

## Appendix A

Table 1: Individual and overall quality score and corresponding level of scientific evidence for previous injury as a risk factor for injury

| Study name             | Question number |   |   |   |   |   |    |    |    |    |    |    |    |    | Quality score (%) | Level of evidence |
|------------------------|-----------------|---|---|---|---|---|----|----|----|----|----|----|----|----|-------------------|-------------------|
|                        | 1               | 2 | 3 | 5 | 6 | 7 | 10 | 11 | 12 | 18 | 20 | 21 | 22 | 25 |                   |                   |
| Nordstrom et al., 2014 | 1               | 1 | 1 | 1 | 1 | 1 | 1  | 1  | 1  | 1  | 1  | 1  | 1  | 0  | 88                | 2++               |
| Hagglund et al. 2013   | 1               | 1 | 1 | 2 | 1 | 1 | 1  | 1  | 1  | 1  | 1  | 1  | 1  | 1  | 100               | 2++               |
| Fousekis et al. 2011   | 1               | 1 | 1 | 0 | 1 | 1 | 1  | 1  | 1  | 1  | 1  | 1  | 0  | 1  | 80                | 2++               |
| Walden et al. 2006     | 1               | 1 | 1 | 2 | 1 | 1 | 1  | 1  | 1  | 1  | 1  | 1  | 1  | 1  | 100               | 2++               |
| Hagglund et al. 2006   | 1               | 1 | 1 | 2 | 1 | 1 | 1  | 1  | 1  | 1  | 1  | 1  | 1  | 1  | 100               | 2++               |
| Arnason et al. 2004    | 1               | 1 | 1 | 2 | 1 | 1 | 1  | 1  | 1  | 1  | 1  | 1  | 1  | 1  | 100               | 2++               |

Table 2: Individual and overall quality score and corresponding level of scientific evidence for muscle imbalance as a risk factor for injury

| Study name           | Question number |   |   |   |   |   |    |    |    |    |    |    |    |    | Quality score (%) | Level of evidence |
|----------------------|-----------------|---|---|---|---|---|----|----|----|----|----|----|----|----|-------------------|-------------------|
|                      | 1               | 2 | 3 | 5 | 6 | 7 | 10 | 11 | 12 | 18 | 20 | 21 | 22 | 25 |                   |                   |
| Fousekis et al. 2012 | 1               | 1 | 1 | 1 | 1 | 1 | 1  | 1  | 1  | 1  | 1  | 1  | 0  | 1  | 87                | 2++               |
| Fousekis et al. 2011 | 1               | 1 | 1 | 0 | 1 | 1 | 1  | 1  | 1  | 1  | 1  | 1  | 0  | 1  | 80                | 2++               |
| Croisier et al. 2008 | 1               | 1 | 1 | 1 | 1 | 1 | 1  | 1  | 1  | 0  | 1  | 1  | 1  | 1  | 87                | 2++               |
| Dauty et al. 2003    | 1               | 1 | 1 | 2 | 1 | 1 | 1  | 1  | 1  | 1  | 1  | 1  | 1  | 1  | 100               | 2++               |

Table 3: Individual and overall quality score and corresponding level of scientific evidence for Questionnaire as a testing tool to identify injury risk

| Study name      | Question number |   |   |   |   |   |    |    |    |    |    |    |    |    | Quality score (%) | Level of evidence |
|-----------------|-----------------|---|---|---|---|---|----|----|----|----|----|----|----|----|-------------------|-------------------|
|                 | 1               | 2 | 3 | 5 | 6 | 7 | 10 | 11 | 12 | 18 | 20 | 21 | 22 | 25 |                   |                   |
| Devantier, 2011 | 1               | 1 | 1 | 1 | 1 | 1 | 1  | 1  | 1  | 1  | 1  | 1  | 1  | 0  | 87                | 2++               |

Table 4: Individual and overall quality score and corresponding level of scientific evidence for isokinetic testing as a testing tool to identify injury risk

| Study name           | Question number |   |   |   |   |   |    |    |    |    |    |    |    |    | Quality score (%) | Level of evidence |
|----------------------|-----------------|---|---|---|---|---|----|----|----|----|----|----|----|----|-------------------|-------------------|
|                      | 1               | 2 | 3 | 5 | 6 | 7 | 10 | 11 | 12 | 18 | 20 | 21 | 22 | 25 |                   |                   |
| Fousekis et al. 2012 | 1               | 1 | 1 | 1 | 1 | 1 | 1  | 1  | 1  | 1  | 1  | 1  | 0  | 1  | 87                | 2++               |
| Fousekis et al. 2011 | 1               | 1 | 1 | 0 | 1 | 1 | 1  | 1  | 1  | 1  | 1  | 1  | 0  | 1  | 80                | 2++               |
| Croisier et al. 2008 | 1               | 1 | 1 | 1 | 1 | 1 | 1  | 1  | 1  | 0  | 1  | 1  | 1  | 1  | 87                | 2++               |
| Dauty et al. 2003    | 1               | 1 | 1 | 2 | 1 | 1 | 1  | 1  | 1  | 1  | 1  | 1  | 1  | 1  | 100               | 2++               |

Table 5: Individual and overall quality score and corresponding level of scientific evidence for eccentric exercise as an exercise to prevent injury

| Study name             | Question number |   |   |   |   |   |   |   |   |    |    |    |    |    |    |    |    |    |    |    |    |    |    |    |    |    |    | Quality Score (%) | Level of Evidence |
|------------------------|-----------------|---|---|---|---|---|---|---|---|----|----|----|----|----|----|----|----|----|----|----|----|----|----|----|----|----|----|-------------------|-------------------|
|                        | 1               | 2 | 3 | 4 | 5 | 6 | 7 | 8 | 9 | 10 | 11 | 12 | 13 | 14 | 15 | 16 | 17 | 18 | 19 | 20 | 21 | 22 | 23 | 24 | 25 | 26 | 27 |                   |                   |
| Arnason et al. (2008)  | 1               | 1 | 1 | 1 | 0 | 1 | 1 | 0 | 0 | 1  | 1  | 1  | 1  | 0  | 0  | 1  | 1  | 0  | 1  | 0  | 1  | 0  | 0  | 0  | 0  | 0  | 5  | 54                | 2+                |
| Croisier et al. (2008) | 1               | 1 | 1 | 1 | 1 | 1 | 1 | 1 | 1 | 1  | 1  | 1  | 1  | 0  | 0  | 1  | 1  | 0  | 1  | 1  | 1  | 0  | 0  | 0  | 1  | 1  | 5  | 71                | 2+                |
| Fredberg et al. 2008   | 1               | 1 | 1 | 1 | 0 | 1 | 1 | 1 | 1 | 1  | 1  | 1  | 1  | 0  | 1  | 1  | 1  | 1  | 0  | 1  | 1  | 1  | 1  | 0  | 0  | 1  | 5  | 74                | 1+                |
| Askling et al. (2003)  | 1               | 1 | 1 | 1 | 2 | 1 | 1 | 1 | 0 | 0  | 1  | 1  | 1  | 0  | 0  | 1  | 1  | 0  | 1  | 1  | 1  | 1  | 0  | 1  | 0  | 0  | 5  | 69                | 1+                |

Table 6: Individual and overall quality score and corresponding level of scientific evidence for balance/proprioception exercise as an exercise to prevent injury

| Study name            | Question number |   |   |   |   |   |   |   |   |    |    |    |    |    |    |    |    |    |    |    |    |    |    |    |    |    |    | Quality Score (%) | Level of Evidence |
|-----------------------|-----------------|---|---|---|---|---|---|---|---|----|----|----|----|----|----|----|----|----|----|----|----|----|----|----|----|----|----|-------------------|-------------------|
|                       | 1               | 2 | 3 | 4 | 5 | 6 | 7 | 8 | 9 | 10 | 11 | 12 | 13 | 14 | 15 | 16 | 17 | 18 | 19 | 20 | 21 | 22 | 23 | 24 | 25 | 26 | 27 |                   |                   |
| Mohammadi et al. 2007 | 1               | 1 | 1 | 1 | 0 | 1 | 1 | 0 | 0 | 1  | 1  | 1  | 1  | 0  | 0  | 1  | 0  | 1  | 0  | 0  | 1  | 0  | 1  | 1  | 0  | 0  | 5  | 57                | 1+                |
